1     **The in situ structures of mono-, di-, and tri-nucleosomes in human**  
2                                           **heterochromatin**

3

4

5                   Shujun Cai <sup>a,†</sup>, Désirée Böck <sup>b,†</sup>, Martin Pilhofer <sup>b,\*</sup>, Lu Gan <sup>a,\*</sup>

6

7

8     <sup>a</sup> Department of Biological Sciences and Centre for Bioluminescence Sciences, National

9     University of Singapore, Singapore 117543

10    <sup>b</sup> Institute of Molecular Biology and Biophysics, Eidgenössische Technische Hochschule

11    Zürich, CH-8093 Zürich, Switzerland

12    <sup>†</sup> These authors contributed equally to this work

13

14    \* Address correspondence to: [lu@anaphase.org](mailto:lu@anaphase.org) or [pilhofer@biol.ethz.ch](mailto:pilhofer@biol.ethz.ch)

15

16    Running title: Cryo-ET of human heterochromatin

17 **Abstract**

18 The *in situ* 3-D organization of chromatin at the nucleosome and oligonucleosome  
19 levels is unknown. Here we use cryo-electron tomography (cryo-ET) to determine the *in*  
20 *situ* structures of HeLa nucleosomes, which have canonical core structures and  
21 asymmetric, flexible linker DNA. Subtomogram remapping suggests that sequential  
22 nucleosomes in heterochromatin follow irregular paths at the oligonucleosome level.  
23 This basic principle of higher-order repressive chromatin folding is compatible with the  
24 conformational variability of the two linker DNAs at the single-nucleosome level.

## 25 INTRODUCTION

26 The fundamental unit of chromatin is the nucleosome, a 10-nm diameter, 6-nm thick  
27 cylindrical complex assembled from eight histone proteins and wrapped ~1.65 times by  
28 146 bp of DNA (Luger *et al.*, 1997; Chua *et al.*, 2016). In cells, many nucleosomes bind  
29 a linker histone, which stabilizes the two linker DNAs in a crossed conformation at the  
30 entry/exit position. When isolated or reconstituted, this larger nucleosome complex is  
31 called the chromatosome (Zhou *et al.*, 2015; Bednar *et al.*, 2017). Chemically fixed  
32 nucleosome chains can form highly ordered 30-nm fibers *in vitro* (Routh *et al.*, 2008;  
33 Song *et al.*, 2014), but these structures have not been detected inside cycling  
34 metazoan, plant, or yeast cells (McDowall *et al.*, 1986; Bouchet-Marquis *et al.*, 2006;  
35 Eltsov *et al.*, 2008; Fussner *et al.*, 2011; Fussner *et al.*, 2012; Gan *et al.*, 2013; Eltsov *et al.*  
36 *et al.*, 2014; Chen *et al.*, 2016; Cai *et al.*, 2017; Ou *et al.*, 2017; Eltsov *et al.*, 2018). While  
37 the consensus is that *in situ* chromatin structure is irregular (Hansen *et al.*, 2018), the 3-  
38 D details of chromatin packing at the nucleosome level remain unknown.

39  
40 Individual nucleosomes are challenging to identify *in situ*. The DNA-proximal negative-  
41 stain approach (ChromEMT) suffers distortions from chemical fixation, dehydration, and  
42 staining, resulting in large groups of nucleosomes appearing as amorphous elongated  
43 bodies instead of sets of discrete particles (Ou *et al.*, 2017). For cryo-EM samples,  
44 small high-contrast non-perturbative stains do not yet exist. Immuno-EM is also not  
45 suitable for protein identification because (1) antibodies would freeze immediately upon  
46 contact with any part of a cryo-EM sample, (2) the antibodies can only access the two  
47 surfaces of typical EM samples, and (3) antibody-gold complexes are too large (> 10

48 nm) to unambiguously identify small complexes in crowded environments. Correlative  
49 cryo-light/cryo-super-resolution microscopy can facilitate the localization of rare or  
50 sparsely distributed complexes, but it does not yet have sufficient resolution to identify  
51 individual nucleosomes in the crowded nucleoplasm (Chang *et al.*, 2014). Large multi-  
52 megadalton complexes have been successfully identified by their structural signature  
53 (their size and shape) (Medalia *et al.*, 2002). This non-invasive approach could in  
54 principle be done for smaller complexes like nucleosomes. We have therefore taken  
55 advantage of sample-preparation, imaging-hardware, and image-processing advances  
56 to determine the structures, positions, and orientations of nucleosomes inside a HeLa  
57 cell. Our resultant subtomogram averages and remapped models reveal a first glimpse  
58 of higher-order heterochromatin structure and folding up to the trinucleosome level *in*  
59 *situ*.

## 60 RESULTS AND DISCUSSION

61 To determine how interphase mammalian chromatin is organized *in situ*, we performed  
62 Volta phase-contrast cryo-electron tomography (cryo-ET) (Fukuda *et al.*, 2015) on a  
63 HeLa cell that was thinned with a new cryo-focused-ion-beam (cryo-FIB) milling  
64 workflow (Medeiros *et al.*, 2018). The resultant cryotomogram shows exceptional detail,  
65 such as the clear delineation of membrane leaflets and a nucleoplasm densely  
66 populated with nucleosomes (Figure 1, A and B). Unlike interphase yeast cells, which  
67 have uniformly distributed nucleosomes (Chen *et al.*, 2016; Cai *et al.*, 2017),  
68 mammalian cells have densely packed perinuclear heterochromatin (Figure 1C) flanking  
69 the nuclear pore and loosely packed euchromatin (Figure 1D) in the interior positions  
70 (Visser *et al.*, 2000; van Steensel and Belmont, 2017).

71  
72 Multi-megadalton complexes are straightforward to identify in cryotomograms (Briegel *et*  
73 *al.*, 2009; Gan *et al.*, 2011; Xi *et al.*, 2011; Asano *et al.*, 2015; Mahamid *et al.*, 2016;  
74 Böck *et al.*, 2017), but nucleosomes are not because they are only ~200 kilodaltons. In  
75 this study, we purify the nucleosomes “*in silico*” by combining template matching with 3-  
76 D classification (Bharat and Scheres, 2016), which we previously showed to be  
77 sensitive enough to identify nucleosomes of different linker-DNA conformations in  
78 nuclear lysates (Cai *et al.*, 2018). To minimize model bias, we used a featureless  
79 cylindrical reference (Figure 2A). This approach reveals a single 3-D class average that  
80 has the nucleosome’s unmistakable structural signatures: the left-handed wrapping of  
81 DNA, with the groove between the two gyres clearly visible at the position opposite of  
82 the DNA entry/exit site (Figure 2B). Like all crystal and cryo-EM structures, the

83 nucleosome class average has two-fold symmetry around the dyad axis. Negative  
84 control 3-D classification of cytoplasmic densities that were template matched the same  
85 way did not produce any nucleosome-like class averages (Supplemental Figure S1).

86

87 Unlike our previous analysis of picoplankton nuclear lysates in the which the  
88 nucleosomes were highly dispersed (Cai *et al.*, 2018), 3-D classification of HeLa  
89 nucleosomes in the crowded nucleus requires a cylindrical mask (Figure 2A). When we  
90 performed reference-free 2-D classification on the nucleosomes with a larger circular  
91 mask, we found that some class averages had extra densities in contact with the  
92 nucleosome (Figure 2C, green arrowheads). These densities are truncated by the  
93 mask, meaning that they belong to larger structures. Furthermore, these extra densities  
94 are weaker and featureless, consistent with their being averages of many different types  
95 of nucleosome-binding partners. Additional rounds of 3-D classification produced a final  
96 set of 1,141 nucleosomes (see Materials and Methods).

97

98 Three-dimensional classification of the final nucleosome set into two classes yielded  
99 averages with either short or long linker-DNA densities (Figure 2D). These two classes  
100 refined to 24 and 21 Å resolution, respectively (Supplemental Figure S2), and resemble  
101 low-pass-filtered density maps calculated from crystal structures (Figure 2E). Indeed,  
102 the averages can accommodate the chromatosome crystal structure after rigid-body  
103 alignment and adjustment of the linker DNA lengths (Figure 2, F and G) (Bednar *et al.*,  
104 2017). The class with the shorter linker DNA can be best fit with a nucleosome core  
105 (151 bp). One of the linker-DNA densities cannot be adequately accounted for by the

106 nucleosome crystal structure (Figure 2F and Supplemental Movie S1) and is instead  
107 consistent with partial unwrapping (Bilokapic *et al.*, 2018b, a). The nucleosome class  
108 with the longer linker DNA is best fit with ~13 bp of DNA in each linker (172 bp total,  
109 Figure 2G and Supplemental Movie S2). The linker DNAs have a crossed conformation  
110 and remain visible when the density map's contour level is raised (Figure 2D). This  
111 structural phenotype is consistent with the linker DNA's conformational stabilization by a  
112 linker histone. Note that HeLa cells have a 183-bp nucleosome-repeat length (Lohr *et*  
113 *al.*, 1977), which predicts that sequential nucleosomes are linked by an average ~12 nm  
114 DNA (37bp × 0.34 nm). Therefore, the short linker DNA densities in one of the  
115 subtomogram averages arises from linker-DNA conformational heterogeneity in the  
116 individual nucleosomes. Finally, classification of the 1,141 nucleosomes into four  
117 classes produces averages that show additional linker-DNA conformations, supporting  
118 the notion that the linker DNA is the most conformationally heterogeneous part of the  
119 nucleosome (Supplemental Figure S3).

120  
121 Our subtomogram averages presented an opportunity to visualize nucleosomes in the  
122 context of higher-order chromatin structure *in situ*. Using the 3-D refined orientations  
123 and positions, we remapped the nucleosomes back into an empty volume the size of  
124 the original cryotomogram (Figure 3). As expected from their appearance in the  
125 tomographic slices (Figure 1A), the nucleosomes are predominantly localized in the  
126 three heterochromatin clusters (Figure 3A). The heterochromatin and euchromatin  
127 contain both classes of nucleosomes (Figure 3, C and D). The nucleosomes in between  
128 the heterochromatin domains appear isolated instead of being parts of contiguous

129 chains. Some nucleosomes must have been missed by our analysis. For example,  
130 nucleosomes oriented with their face parallel to the lamella surface were missed  
131 (Supplemental Figure S2, B and C); nucleosomes oriented this way are known to be  
132 challenging to locate in plunge-frozen samples (Chua *et al.*, 2016). Our analysis would  
133 also have missed nucleosomes that make multiple contacts with large protein  
134 complexes (McGinty and Tan, 2015; Morgan *et al.*, 2016; Wilson *et al.*, 2016; Xu *et al.*,  
135 2016; Farnung *et al.*, 2017; Liu *et al.*, 2017; Ayala *et al.*, 2018; Eustermann *et al.*, 2018)  
136 and nucleosomes with unconventional structures such as partially unwrapped  
137 nucleosomes (Bilokapic *et al.*, 2018a, b) and hexasomes (Kato *et al.*, 2017).

138

139 Many nucleosomes are likely to be interacting with each other because their linker-DNA  
140 densities are coaxial or because their cores are nearly stacked. We recognized four  
141 types of nucleosome-nucleosome arrangements (Figure 3, D – G and Supplemental  
142 Figure S4): nucleosome pairs likely to be connected by linker DNA (Figure 3D);  
143 nucleosome pairs oriented with face-to-face interactions (Figure 3E); nucleosome pairs  
144 likely to share linker DNA with a third, unmapped nucleosome (Figure 3F); and  
145 trinucleosomes likely connected by linker DNA (Figure 3G). The visualization of linker  
146 DNA densities in the subtomogram averages and remapped models provides the first  
147 clues about the path of DNA at the trinucleosome level (Figure 3, F and G).

148 Nucleosomes in these examples are likely to follow an irregular zig-zag path. Periodic  
149 motifs such as those found in tetranucleosomes were not found and therefore must be  
150 exceptionally rare (Schalch *et al.*, 2005; Song *et al.*, 2014).

151



152 Chromatin higher-order structure is extremely sensitive to linker DNA parameters. For  
153 example, tetranucleosome face-to-face stacking can be abolished *in vitro* with a small  
154 change in linker-DNA length (Ekundayo *et al.*, 2017). Recent cryo-EM studies showed  
155 that dinucleosomes have variable conformations even when they are reconstituted with  
156 a strong positioning sequence and are bound to either heterochromatin protein 1 or  
157 Polycomb repressive complex 2 (Machida *et al.*, 2018; Poepsel *et al.*, 2018). Our  
158 subtomogram averages and remapped nucleosomes are consistent with a model in  
159 which variations of linker DNA length and orientation at the single nucleosome level *in*  
160 *situ* give rise to irregular higher-order chromatin structure at the dinucleosome and  
161 trinucleosome levels (Figure 3H). Chromatin can therefore pack densely in  
162 heterochromatin without folding into periodic motifs. Future advances in cryo thinning,  
163 automation, subtomogram classification, and remapping will be important tools to  
164 dissect *in situ* chromatin structure in greater detail.

## 165 **MATERIALS AND METHODS**

166

### 167 **Cell culture**

168 HeLa CCL2- cells (ATCC) were grown in DMEM (Gibco) supplemented with 10%  
169 inactivated FCS (Invitrogen) and 50 µg/mL streptomycin (AppliChem) at 37°C and 5%  
170 CO<sub>2</sub>. For electron microscopy (EM) imaging experiments, EM finder grids (gold NH<sub>2</sub>  
171 R2/2, Quantifoil) were sterilized under UV light and then glow discharged. Grids were  
172 placed on the bottom of the wells of a 12-well plate (Nunc, Thermo Fisher) and  
173 equilibrated with DMEM for 30 min. Subsequently, 30,000 HeLa cells were seeded into  
174 each well and incubated overnight until vitrification.

175

### 176 **Preparation of frozen-hydrated specimens**

177 Plunge freezing was performed as previously reported (Weiss *et al.*, 2017). Grids were  
178 removed from the wells using forceps. The forceps were then mounted in the Vitrobot  
179 and the grid was blotted from the backside by installing a Teflon sheet on one of the  
180 blotting pads. Grids were plunge-frozen in liquid ethane-propane (37 %/63 %) (Tivol *et*  
181 *al.*, 2008) using a Vitrobot Mk 4 (Thermo Fisher) and stored in liquid nitrogen.

182

### 183 **Cryo-FIB milling**

184 Cryo-FIB was used to cryo-thin samples of plunge-frozen HeLa cells so that they could  
185 be imaged by cryo-ET (Marko *et al.*, 2007). Frozen grids with HeLa cells were first  
186 clipped into modified Autogrids (Thermo Fisher) (Medeiros *et al.*, 2018) and then  
187 transferred into the liquid-nitrogen bath of a loading station (Leica Microsystems). Grids

188 were clamped onto a “40° pre-tilted TEM grid holder” (Leica Microsystems) and the  
189 holder was subsequently shuttled from the loading station to the dual-beam instrument  
190 using the VCT100 transfer system (Leica Microsystems). The holder was mounted on a  
191 custom-built cryo stage (Leica Microsystems) in a Helios NanoLab600i dual-beam  
192 FIB/SEM instrument (Thermo Fisher). The stage temperature was maintained below -  
193 154°C during the loading, milling and unloading procedures. Grid quality was checked  
194 by scanning EM imaging (5 kV, 21 pA). Samples were coated with a platinum precursor  
195 gas using the Gas Injector System and a “cold deposition” technique (Hayles *et al.*,  
196 2007). Lamellae were milled in several steps. We first targeted two rectangular regions  
197 with the ion beam set to 30 kV and ~400 pA to generate a ~2- $\mu$ m-thick lamella. The ion-  
198 beam current was then gradually decreased until the lamella reached a nominal  
199 thickness of ~200 nm (ion beam set to ~25 pA). After documentation of the lamellae by  
200 scanning EM imaging, the holder was brought back to the loading station using the  
201 VCT100 transfer system. The grids were unloaded and stored in liquid nitrogen.

202

### 203 **Electron cryomicroscopy and electron cryotomography**

204 The cryo-EM imaging details are listed in Table S1. Cryo-FIB-processed HeLa cells  
205 were examined by both cryo-EM and cryo-ET (Weiss *et al.*, 2017). Images were  
206 recorded on a Titan Krios transmission electron cryomicroscope (Thermo Fisher)  
207 equipped with a K2 Summit direct-detection camera (Gatan), Quantum LS imaging filter  
208 (Gatan), and a Volta phase plate (Thermo Fisher). The microscope was operated at 300  
209 kV with the imaging filter slit width set to 20 eV. Data were collected in-focus using the  
210 Volta phase plate. The pixel size at the specimen level was 3.45 Å. Tilt series covered

211 an angular range from  $-60^\circ$  to  $+60^\circ$  with  $2^\circ$  increments. The total dose of a tilt series  
212 was  $120 \text{ e}^-/\text{\AA}^2$ . Tilt series and 2-D projection images were acquired automatically using  
213 SerialEM(Mastronarde, 2005). Three-dimensional reconstructions and segmentations  
214 were generated using the IMOD program suite (Mastronarde, 2008). To increase the  
215 contrast, the tilt series was binned two-fold in the IMOD program *Etomo*, resulting in a  
216 final specimen-level pixel size of  $6.9 \text{ \AA}$ .

217

### 218 **Template matching**

219 The subtomogram analysis strategy was to find as many candidate nucleosomes as  
220 possible, then remove the majority of false positives by 3-D classification (Cai *et al.*,  
221 2018). Template matching was done with PEET (Nicastro *et al.*, 2006; Heumann, 2016).  
222 To speed up the search, the tomogram was binned three-fold, corresponding to a  $10.35$   
223  $\text{\AA}$  voxels. A featureless  $10 \text{ nm}$  diameter  $\times$   $6 \text{ nm}$  thick cylinder was created with the Bsoft  
224 (Heymann and Belnap, 2007) program *beditimg* and for use as the initial reference  
225 model. To emulate the effects of Volta phase contrast, this reference was corrupted with  
226 the Bsoft program *bctf* using a 3-D contrast transfer function with the fraction of  
227 amplitude contrast set to  $0.5$ . To suppress the effects of nucleoplasmic background  
228 densities, the template was masked with a soft-edged cylinder. To minimize the number  
229 of false negatives, we used a very low cross-correlation cutoff of  $\text{CC} = 0.2$ . We also set  
230 the minimum inter-particle spacing to  $6 \text{ nm}$ , which ensured that any face-to-face stacked  
231 nucleosomes would not be missed. To minimize model bias, only data up to  $\sim 50 \text{ \AA}$   
232 resolution were used. Using these criteria,  $\sim 24,700$  of  $\sim 83,300$  possible hits were

233 retained. Visual inspection of the hits list confirmed that many non-nucleosome  
234 densities were also included.

235

### 236 **Classification analysis and 3-D subtomogram remapping**

237 All 2-D and 3-D classification and 3-D auto-refinement were done with RELION 2.1  
238 (Kimanius *et al.*, 2016) using default parameters except where noted below. A large box  
239 (~2× the nucleosome diameter) was used so that the particle center could be refined  
240 during classification. This box choice resulted in the introduction of new false positives,  
241 which were dealt with a second round of template matching (see below). The template-  
242 matched particles were extracted using the subtomogram analysis routines (Bharat *et*  
243 *al.*, 2015). Orientation information was discarded in this process. For 2-D classification,  
244 the mask diameter was 140 Å and the regularization parameter T was set to 4. Three-  
245 dimensional classification was done with a featureless 10-nm diameter × 6-nm thick  
246 cylindrical reference and a larger cylindrical mask with a soft edge (Figure 2A).  
247 Sequential rounds of 3-D classification pruned the nucleosome class to 1,883 particles.  
248 RELION performs classification and alignment simultaneously, meaning that it functions  
249 as another form of multi-class template matching in which the templates can change  
250 during the run. One consequence is that some nucleosome centers can translate to  
251 positions that either overlap neighboring nucleosomes or correspond to the  
252 nucleoplasm. To deal with the existence of new false positives, an additional round of  
253 template matching was performed in PEET, using only the refined positions of the 1,883  
254 classified particles that contributed to the nucleosome class averages. The refined  
255 nucleosome density map (including the 1,883 particles) was used as the new template-

256 matching reference. PEET removed the duplicated particles automatically. Next, the  
257 cross-correlation threshold relative to the template was incrementally increased until  
258 most of the spurious positions in the nucleoplasm were removed, yielding the final set of  
259 1,141 nucleosomes. A final 3-D classification was performed with two classes, resulting  
260 in one class average with long linker DNA and one with short linker DNA. Following 3-D  
261 autorefinement, the angular distribution was checked by loading the final .bild file and  
262 density maps together in UCSF Chimera (Pettersen *et al.*, 2004).

263         The nucleosome averages were remapped using the script *ot\_remap.py*  
264 (<https://github.com/anaphaze/ot-tools>), which orients and positions each RELION class  
265 average into an empty volume the same size as the original tomogram (Cai *et al.*,  
266 2018). One remapped model was created for each class (short and long linker DNA).  
267 The two models were then combined with the Bsoft program *badd*. Because the pair-  
268 wise inter-nucleosome distances and positions, i.e., higher-order structure, was so  
269 heterogeneous, dinucleosomes and trinucleosomes had to be located manually in  
270 UCSF Chimera. To facilitate this manual search, the clipping planes were positioned so  
271 that the thickness along the view axis was < 40 nm. Pairs of nucleosomes were  
272 considered to be interacting if their linker DNAs were aligned (sequential nucleosomes)  
273 or if any part of the two nucleosomes were within ~2 nm.

274

### 275 **Crystal structure docking**

276 Because cryo-ET *in situ* subtomogram averages have much-lower resolutions than  
277 crystal structures, the goal was to conservatively dock a chromosome crystal structure  
278 into the subtomogram averages. Of the two chromosome structures (Zhou *et al.*,

279 2015; Bednar *et al.*, 2017), 5NL0 fit as a rigid body into the class with long linker DNA  
280 with minimal modification. This crystal structure was used as a starting point for further  
281 editing. For the nucleosome with longer linker DNA, 13 and 12 base pairs were  
282 removed from the linker-DNA termini, leaving 172 bp DNA. For the nucleosome with  
283 shorter linkers, 24 and 22 bp of DNA was removed from the linker-DNA termini, leaving  
284 151 bp of DNA. Next the chromatosome model was docked automatically with the  
285 UCSF Chimera *fit-in-map* routine, using a map simulated to 20 Å resolution. These  
286 produced map-to-model correlations of 0.95 (nucleosome with long linker) and 0.87  
287 (nucleosome with short linker). Owing to the limited resolution, no further attempts were  
288 made to refine the atomic model.

289

## 290 **Graphics**

291 Figure panels were created in Adobe Illustrator CS6, Google Sheets, or Blender 2.79  
292 (<https://www.blender.org>) and then arranged in Adobe Photoshop CS6.

293

## 294 **Data availability**

295 The unbinned frame-aligned tilt series was deposited in the Electron Microscopy Public  
296 Image Archive (Iudin *et al.*, 2016) as EMPIAR-10179. The two-fold binned tomogram  
297 and the nucleosome subtomogram averages with short and long linker DNA were  
298 deposited in the Electron Microscopy Data Bank as EMD-6948, EMD-6949, and EMD-  
299 6950, respectively.

300

301

302 **ACKNOWLEDGEMENTS**

303 We thank Duane Loh and Reza Khayat for discussions on heterogeneity and  
304 classification, John Heumann for advice on how to accelerate PEET template matching,  
305 and members of the Gan and Pilhofer teams and Alex Noble for feedback. ScopeM is  
306 acknowledged for instrument access at ETH Zürich. SC and LG were supported by a  
307 MOE T2 R-154-000-624-112, MOE T1 R-154-000-A49-114, and a NUS YIA R-154-000-  
308 558-133. DB and MP were supported by the European Research Council, the Swiss  
309 National Science Foundation, and the Helmut Horten Foundation.

310

311 **Contributions**

312 SC - experiments, writing, DB - experiments, writing, MP - writing, LG - experiments,  
313 writing.



314 **REFERENCES**

- 315 Asano, S., Fukuda, Y., Beck, F., Aufderheide, A., Forster, F., Danev, R., and Baumeister, W.  
316 (2015). Proteasomes. A molecular census of 26S proteasomes in intact neurons. *Science* 347,  
317 439-442.
- 318 Ayala, R., Willhoft, O., Aramayo, R.J., Wilkinson, M., McCormack, E.A., Ocloo, L., Wigley, D.B.,  
319 and Zhang, X. (2018). Structure and regulation of the human INO80-nucleosome complex.  
320 *Nature*.
- 321 Bednar, J., Garcia-Saez, I., Boopathi, R., Cutter, A.R., Papai, G., Reymer, A., Syed, S.H., Lone,  
322 I.N., Tonchev, O., Crucifix, C., Menoni, H., Papin, C., Skoufias, D.A., Kurumizaka, H., Lavery,  
323 R., Hamiche, A., Hayes, J.J., Schultz, P., Angelov, D., Petosa, C., and Dimitrov, S. (2017).  
324 Structure and Dynamics of a 197 bp Nucleosome in Complex with Linker Histone H1. *Mol Cell*  
325 66, 384-397 e388.
- 326 Bharat, T.A., Russo, C.J., Lowe, J., Passmore, L.A., and Scheres, S.H. (2015). Advances in  
327 Single-Particle Electron Cryomicroscopy Structure Determination applied to Sub-tomogram  
328 Averaging. *Structure* 23, 1743-1753.
- 329 Bharat, T.A., and Scheres, S.H. (2016). Resolving macromolecular structures from electron  
330 cryo-tomography data using subtomogram averaging in RELION. *Nat Protoc* 11, 2054-2065.
- 331 Bilokapic, S., Strauss, M., and Halic, M. (2018a). Histone octamer rearranges to adapt to DNA  
332 unwrapping. *Nat Struct Mol Biol* 25, 101-108.
- 333 Bilokapic, S., Strauss, M., and Halic, M. (2018b). Structural rearrangements of the histone  
334 octamer translocate DNA. *Nat Commun* 9, 1330.
- 335 Böck, D., Medeiros, J.M., Tsao, H.F., Penz, T., Weiss, G.L., Aistleitner, K., Horn, M., and  
336 Pilhofer, M. (2017). In situ architecture, function, and evolution of a contractile injection system.  
337 *Science* 357, 713-717.
- 338 Bouchet-Marquis, C., Dubochet, J., and Fakan, S. (2006). Cryoelectron microscopy of vitrified  
339 sections: a new challenge for the analysis of functional nuclear architecture. *Histochem Cell Biol*  
340 125, 43-51.
- 341 Briegel, A., Ortega, D.R., Tocheva, E.I., Wuichet, K., Li, Z., Chen, S., Muller, A., Iancu, C.V.,  
342 Murphy, G.E., Dobro, M.J., Zhulin, I.B., and Jensen, G.J. (2009). Universal architecture of  
343 bacterial chemoreceptor arrays. *Proc Natl Acad Sci U S A* 106, 17181-17186.
- 344 Cai, S., Chen, C., Tan, Z.Y., Huang, Y., Shi, J., and Gan, L. (2017). Cryo-ET reveals  
345 nucleosome reorganization in condensed mitotic chromosomes in vivo. *bioRxiv*.
- 346 Cai, S., Song, Y., Chen, C., Shi, J., and Gan, L. (2018). Natural chromatin is heterogeneous and  
347 self-associates in vitro. *Mol Biol Cell*, mbcE17070449.
- 348 Chang, Y.W., Chen, S., Tocheva, E.I., Treuner-Lange, A., Lobach, S., Sogaard-Andersen, L.,  
349 and Jensen, G.J. (2014). Correlated cryogenic photoactivated localization microscopy and cryo-  
350 electron tomography. *Nat Methods* 11, 737-739.

- 351 Chen, C., Lim, H.H., Shi, J., Tamura, S., Maeshima, K., Surana, U., and Gan, L. (2016).  
352 Budding yeast chromatin is dispersed in a crowded nucleoplasm in vivo. *Mol Biol Cell* 27, 3357-  
353 3368.
- 354 Chua, E.Y., Vogirala, V.K., Inian, O., Wong, A.S., Nordenskiold, L., Plitzko, J.M., Danev, R., and  
355 Sandin, S. (2016). 3.9 A structure of the nucleosome core particle determined by phase-plate  
356 cryo-EM. *Nucleic Acids Res* 44, 8013-8019.
- 357 Ekundayo, B., Richmond, T.J., and Schalch, T. (2017). Capturing Structural Heterogeneity in  
358 Chromatin Fibers. *J Mol Biol* 429, 3031-3042.
- 359 Eltsov, M., Grewe, D., Lemercier, N., Frangakis, A., Livolant, F., and Leforestier, A. (2018).  
360 Nucleosome conformational variability in solution and in interphase nuclei evidenced by cryo-  
361 electron microscopy of vitreous sections. *bioRxiv*.
- 362 Eltsov, M., Maclellan, K.M., Maeshima, K., Frangakis, A.S., and Dubochet, J. (2008). Analysis of  
363 cryo-electron microscopy images does not support the existence of 30-nm chromatin fibers in  
364 mitotic chromosomes in situ. *Proc Natl Acad Sci U S A* 105, 19732-19737.
- 365 Eltsov, M., Sosnovski, S., Olins, A.L., and Olins, D.E. (2014). ELCS in ice: cryo-electron  
366 microscopy of nuclear envelope-limited chromatin sheets. *Chromosoma* 123, 303-312.
- 367 Eustermann, S., Schall, K., Kostrewa, D., Lakomek, K., Strauss, M., Moldt, M., and Hopfner,  
368 K.P. (2018). Structural basis for ATP-dependent chromatin remodelling by the INO80 complex.  
369 *Nature*.
- 370 Farnung, L., Vos, S.M., Wigge, C., and Cramer, P. (2017). Nucleosome-Chd1 structure and  
371 implications for chromatin remodelling. *Nature* 550, 539-542.
- 372 Fukuda, Y., Laugks, U., Lucic, V., Baumeister, W., and Danev, R. (2015). Electron  
373 cryotomography of vitrified cells with a Volta phase plate. *J Struct Biol* 190, 143-154.
- 374 Fussner, E., Djuric, U., Strauss, M., Hotta, A., Perez-Iratxeta, C., Lanner, F., Dilworth, F.J., Ellis,  
375 J., and Bazett-Jones, D.P. (2011). Constitutive heterochromatin reorganization during somatic  
376 cell reprogramming. *EMBO J* 30, 1778-1789.
- 377 Fussner, E., Strauss, M., Djuric, U., Li, R., Ahmed, K., Hart, M., Ellis, J., and Bazett-Jones, D.P.  
378 (2012). Open and closed domains in the mouse genome are configured as 10-nm chromatin  
379 fibres. *EMBO Rep* 13, 992-996.
- 380 Gan, L., Ladinsky, M.S., and Jensen, G.J. (2011). Organization of the smallest eukaryotic  
381 spindle. *Curr Biol* 21, 1578-1583.
- 382 Gan, L., Ladinsky, M.S., and Jensen, G.J. (2013). Chromatin in a marine picoeukaryote is a  
383 disordered assemblage of nucleosomes. *Chromosoma* 122, 377-386.
- 384 Hansen, J.C., Connolly, M., McDonald, C.J., Pan, A., Pryamkova, A., Ray, K., Seidel, E.,  
385 Tamura, S., Rogge, R., and Maeshima, K. (2018). The 10-nm chromatin fiber and its  
386 relationship to interphase chromosome organization. *Biochem Soc Trans* 46, 67-76.

- 387 Hayles, M.F., Stokes, D.J., Phifer, D., and Findlay, K.C. (2007). A technique for improved  
388 focused ion beam milling of cryo-prepared life science specimens. *J Microsc* 226, 263-269.
- 389 Heumann, J.M. (2016). PEET: University of Colorado Boulder.
- 390 Heymann, J.B., and Belnap, D.M. (2007). Bsoft: image processing and molecular modeling for  
391 electron microscopy. *J Struct Biol* 157, 3-18.
- 392 Iudin, A., Korir, P.K., Salavert-Torres, J., Kleywegt, G.J., and Patwardhan, A. (2016). EMPIAR:  
393 a public archive for raw electron microscopy image data. *Nat Methods* 13, 387-388.
- 394 Kato, D., Osakabe, A., Arimura, Y., Mizukami, Y., Horikoshi, N., Saikusa, K., Akashi, S.,  
395 Nishimura, Y., Park, S.Y., Nogami, J., Maehara, K., Ohkawa, Y., Matsumoto, A., Kono, H.,  
396 Inoue, R., Sugiyama, M., and Kurumizaka, H. (2017). Crystal structure of the overlapping  
397 dinucleosome composed of hexasome and octasome. *Science* 356, 205-208.
- 398 Kimanius, D., Forsberg, B.O., Scheres, S.H., and Lindahl, E. (2016). Accelerated cryo-EM  
399 structure determination with parallelisation using GPUs in RELION-2. *Elife* 5.
- 400 Liu, X., Li, M., Xia, X., Li, X., and Chen, Z. (2017). Mechanism of chromatin remodelling  
401 revealed by the Snf2-nucleosome structure. *Nature* 544, 440-445.
- 402 Lohr, D., Corden, J., Tatchell, K., Kovacic, R.T., and Van Holde, K.E. (1977). Comparative  
403 subunit structure of HeLa, yeast, and chicken erythrocyte chromatin. *Proc Natl Acad Sci U S A*  
404 74, 79-83.
- 405 Luger, K., Mader, A.W., Richmond, R.K., Sargent, D.F., and Richmond, T.J. (1997). Crystal  
406 structure of the nucleosome core particle at 2.8 Å resolution. *Nature* 389, 251-260.
- 407 Machida, S., Takizawa, Y., Ishimaru, M., Sugita, Y., Sekine, S., Nakayama, J.I., Wolf, M., and  
408 Kurumizaka, H. (2018). Structural Basis of Heterochromatin Formation by Human HP1. *Mol*  
409 *Cell*.
- 410 Mahamid, J., Pfeffer, S., Schaffer, M., Villa, E., Danev, R., Cuellar, L.K., Forster, F., Hyman,  
411 A.A., Plitzko, J.M., and Baumeister, W. (2016). Visualizing the molecular sociology at the HeLa  
412 cell nuclear periphery. *Science* 351, 969-972.
- 413 Marko, M., Hsieh, C., Schalek, R., Frank, J., and Mannella, C. (2007). Focused-ion-beam  
414 thinning of frozen-hydrated biological specimens for cryo-electron microscopy. *Nat Methods* 4,  
415 215-217.
- 416 Mastronarde, D.N. (2005). Automated electron microscope tomography using robust prediction  
417 of specimen movements. *J Struct Biol* 152, 36-51.
- 418 Mastronarde, D.N. (2008). Correction for non-perpendicularity of beam and tilt axis in  
419 tomographic reconstructions with the IMOD package. *J Microsc* 230, 212-217.
- 420 McDowell, A.W., Smith, J.M., and Dubochet, J. (1986). Cryo-electron microscopy of vitrified  
421 chromosomes in situ. *EMBO J* 5, 1395-1402.

- 422 McGinty, R.K., and Tan, S. (2015). Nucleosome structure and function. *Chem Rev* 115, 2255-  
423 2273.
- 424 Medalia, O., Weber, I., Frangakis, A.S., Nicastro, D., Gerisch, G., and Baumeister, W. (2002).  
425 Macromolecular architecture in eukaryotic cells visualized by cryoelectron tomography. *Science*  
426 298, 1209-1213.
- 427 Medeiros, J.M., Bock, D., Weiss, G.L., Kooger, R., Wepf, R.A., and Pilhofer, M. (2018). Robust  
428 workflow and instrumentation for cryo-focused ion beam milling of samples for electron  
429 cryotomography. *Ultramicroscopy* 190, 1-11.
- 430 Morgan, M.T., Haj-Yahya, M., Ringel, A.E., Bandi, P., Brik, A., and Wolberger, C. (2016).  
431 Structural basis for histone H2B deubiquitination by the SAGA DUB module. *Science* 351, 725-  
432 728.
- 433 Nicastro, D., Schwartz, C., Pierson, J., Gaudette, R., Porter, M.E., and McIntosh, J.R. (2006).  
434 The molecular architecture of axonemes revealed by cryoelectron tomography. *Science* 313,  
435 944-948.
- 436 Ou, H.D., Phan, S., Deerinck, T.J., Thor, A., Ellisman, M.H., and O'Shea, C.C. (2017).  
437 ChromEMT: Visualizing 3D chromatin structure and compaction in interphase and mitotic cells.  
438 *Science* 357.
- 439 Pettersen, E.F., Goddard, T.D., Huang, C.C., Couch, G.S., Greenblatt, D.M., Meng, E.C., and  
440 Ferrin, T.E. (2004). UCSF Chimera--a visualization system for exploratory research and  
441 analysis. *J Comput Chem* 25, 1605-1612.
- 442 Poepsel, S., Kasinath, V., and Nogales, E. (2018). Cryo-EM structures of PRC2 simultaneously  
443 engaged with two functionally distinct nucleosomes. *Nat Struct Mol Biol* 25, 154-162.
- 444 Routh, A., Sandin, S., and Rhodes, D. (2008). Nucleosome repeat length and linker histone  
445 stoichiometry determine chromatin fiber structure. *Proc Natl Acad Sci U S A* 105, 8872-8877.
- 446 Schalch, T., Duda, S., Sargent, D.F., and Richmond, T.J. (2005). X-ray structure of a  
447 tetranucleosome and its implications for the chromatin fibre. *Nature* 436, 138-141.
- 448 Song, F., Chen, P., Sun, D., Wang, M., Dong, L., Liang, D., Xu, R.M., Zhu, P., and Li, G. (2014).  
449 Cryo-EM study of the chromatin fiber reveals a double helix twisted by tetranucleosomal units.  
450 *Science* 344, 376-380.
- 451 Tivol, W.F., Briegel, A., and Jensen, G.J. (2008). An improved cryogen for plunge freezing.  
452 *Microsc Microanal* 14, 375-379.
- 453 van Steensel, B., and Belmont, A.S. (2017). Lamina-Associated Domains: Links with  
454 Chromosome Architecture, Heterochromatin, and Gene Repression. *Cell* 169, 780-791.
- 455 Visser, A.E., Jaunin, F., Fakan, S., and Aten, J.A. (2000). High resolution analysis of interphase  
456 chromosome domains. *J Cell Sci* 113 ( Pt 14), 2585-2593.
- 457 Weiss, G.L., Medeiros, J.M., and Pilhofer, M. (2017). In Situ Imaging of Bacterial Secretion  
458 Systems by Electron Cryotomography. *Methods Mol Biol* 1615, 353-375.

- 459 Wilson, M.D., Benlekbir, S., Fradet-Turcotte, A., Sherker, A., Julien, J.P., McEwan, A.,  
460 Noordermeer, S.M., Sicheri, F., Rubinstein, J.L., and Durocher, D. (2016). The structural basis  
461 of modified nucleosome recognition by 53BP1. *Nature* 536, 100-103.
- 462 Xi, Y., Yao, J., Chen, R., Li, W., and He, X. (2011). Nucleosome fragility reveals novel functional  
463 states of chromatin and poises genes for activation. *Genome Res* 21, 718-724.
- 464 Xu, P., Li, C., Chen, Z., Jiang, S., Fan, S., Wang, J., Dai, J., Zhu, P., and Chen, Z. (2016). The  
465 NuA4 Core Complex Acetylates Nucleosomal Histone H4 through a Double Recognition  
466 Mechanism. *Mol Cell* 63, 965-975.
- 467 Zhou, B.R., Jiang, J., Feng, H., Ghirlando, R., Xiao, T.S., and Bai, Y. (2015). Structural  
468 Mechanisms of Nucleosome Recognition by Linker Histones. *Mol Cell* 59, 628-638.  
469



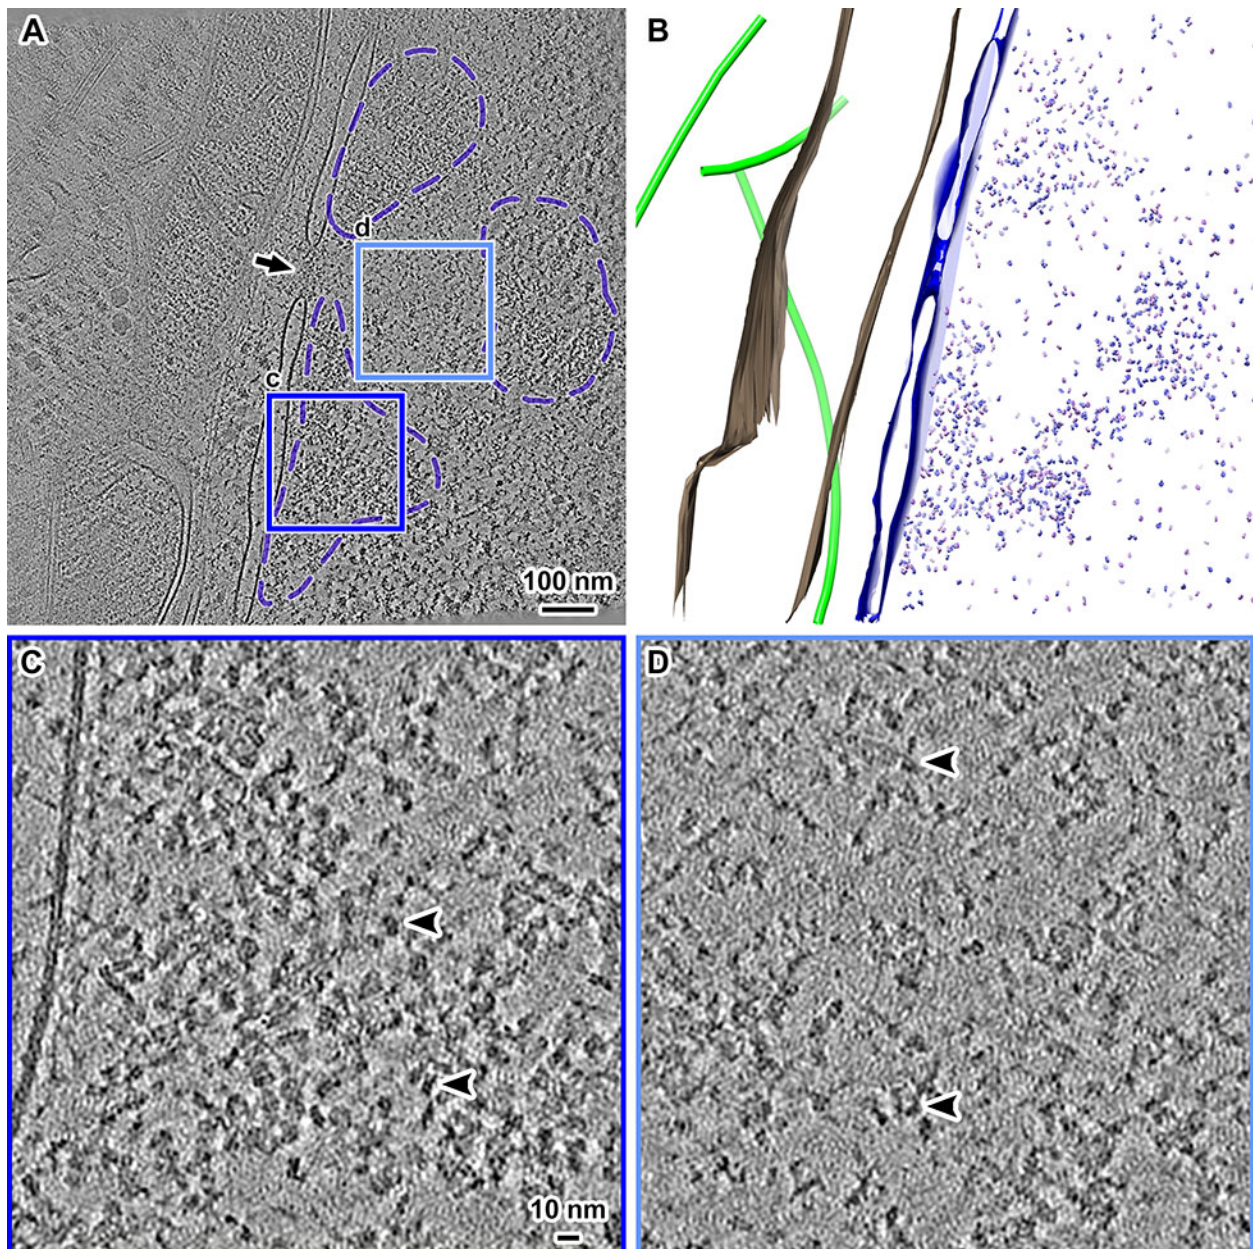

470

471 **FIGURE 1: Volta cryotomogram of a cryo-FIB-thinned HeLa cell**

472 **(A)** Tomographic slice (20 nm) of the nuclear periphery of a HeLa cell. The nuclear pore

473 is indicated by the arrow. Three heterochromatin positions are delineated by purple

474 dashed lines. **(B)** Segmentation of the mitochondrial outer membrane (brown),

475 microtubules (green), and the nuclear envelope (dark blue). The *in silico* purified

476 nucleosomes are also shown (blue and magenta puncta, see text). **(C, D)** Tomographic

- 477 slices (10 nm) of the **(C)** heterochromatin and **(D)** euchromatin positions boxed in panel
- 478 **A**, enlarged 4.5-fold. Several nucleosomes are indicated by arrowheads.

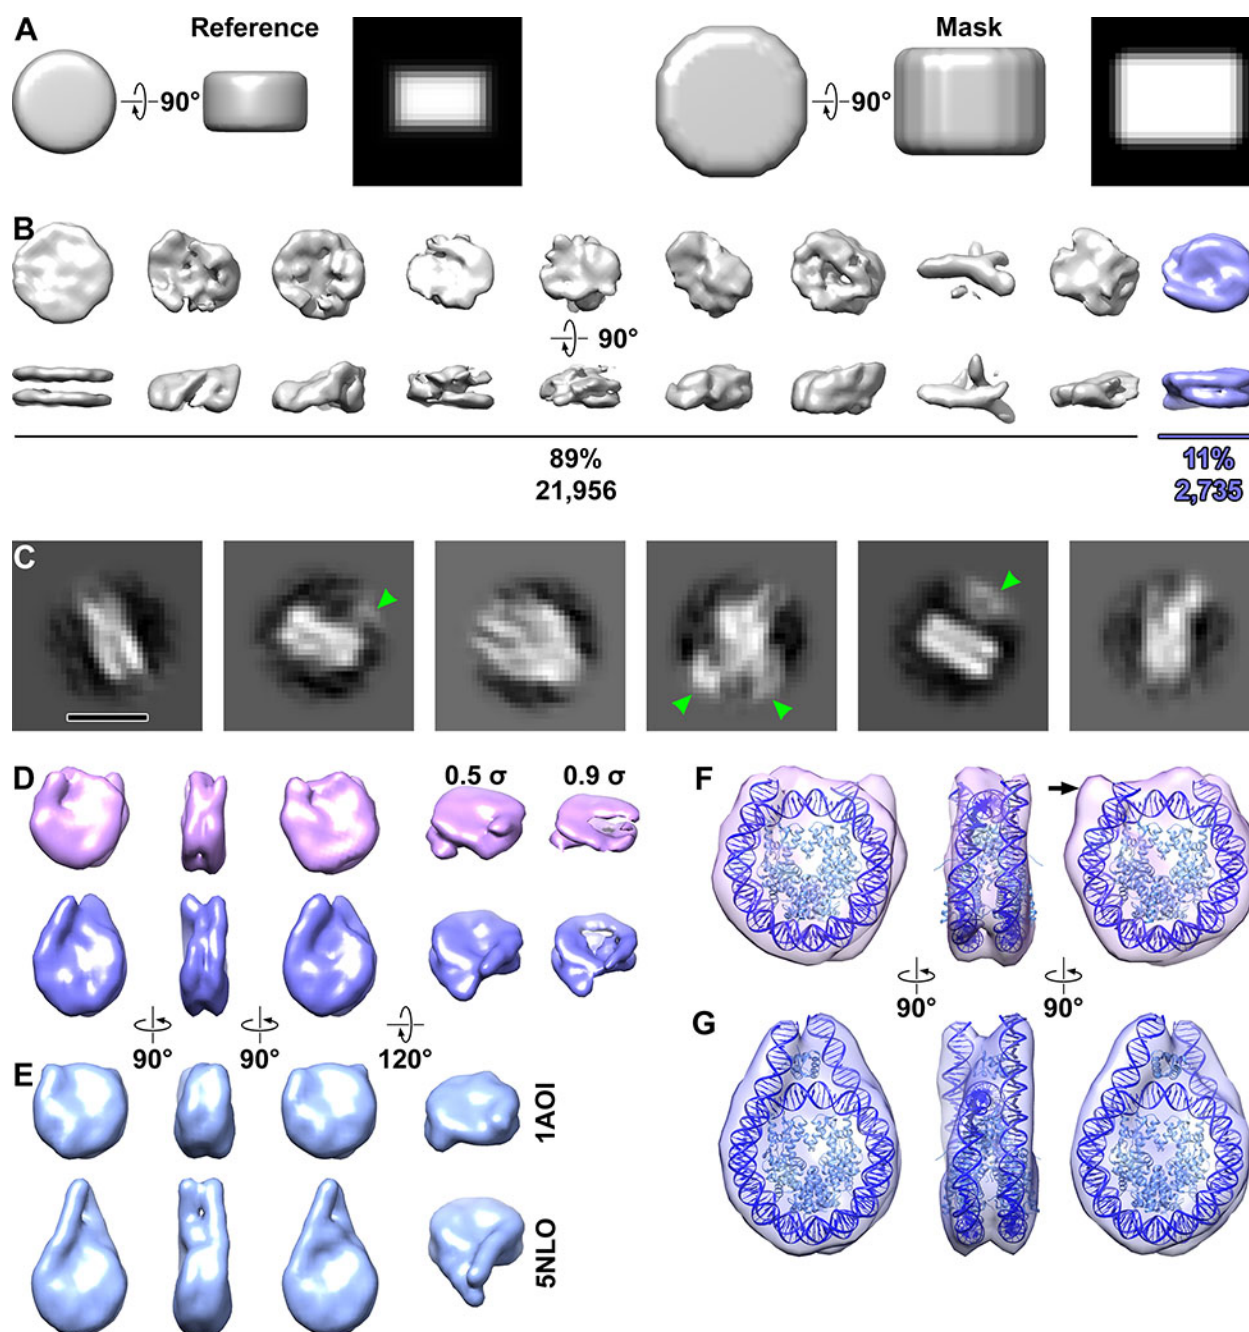

479

480 **FIGURE 2: Structural analysis of nucleosomes *in situ***

481 (A) The reference model (left half) and mask (right half) used for 3-D

482 classification and averaging. The reference is 10 nm wide and 6 nm thick. Both the

483 reference and mask have soft edges that slowly decay to zero. The rightmost subpanel

484 (black background) for both the reference and mask are central slices through the side



485 view. **(B)** Three-dimensional class averages of all template-matching hits. The  
486 nucleosome class average (blue) is oriented with its two-fold dyad axis running  
487 horizontal. **(C)** Example 2-D class averages from the nucleosomes identified by 3-D  
488 classification. Some of the class averages that have densities from nucleosome-  
489 associated complexes (green arrowheads). Bar, 10 nm. **(D)** Final 3-D class averages of  
490 nucleosomes, showing from left to right the front, side, and back, and oblique views.  
491 One class (39%, magenta) has shorter linker-DNA densities than the other (61%, blue).  
492 Maps in all columns are contoured at  $0.5 \sigma$  except in the rightmost column, which is set  
493 to  $0.9 \sigma$  to better show the left-handed superhelical DNA path and the degree of linker  
494 DNA heterogeneity. **(E)** Crystal structures of the nucleosome core (PDB 1AOI, upper)  
495 and chromosome (PDB 5NLO, lower), rendered as 15 Å resolution density maps. **(F,**  
496 **G)** Refined maps of the two nucleosome classes, with the edited chromosome crystal  
497 structure docked **(F)** without or **(G)** with the linker histone, and linker DNA appropriately  
498 truncated. The histones and DNA are light and dark blue, respectively.

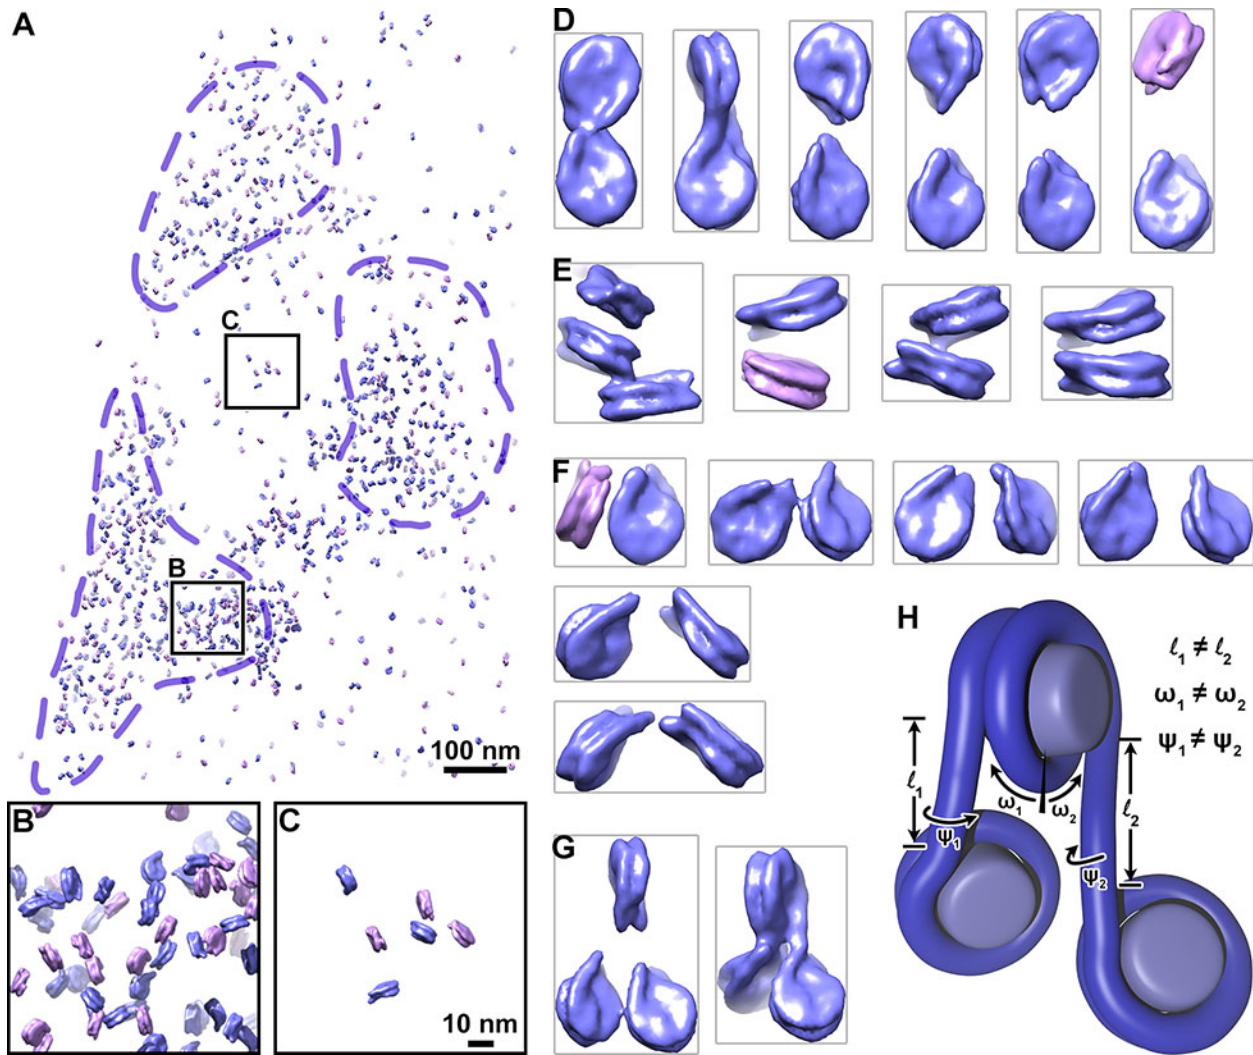

499

500 **FIGURE 3: Chromatin is irregular at the oligonucleosome level *in situ***

501 (A) Model of short-linker (magenta) and long-linker (blue) nucleosomes remapped  
 502 according to their positions and orientations in the nucleus. Dashed purple lines indicate  
 503 approximate boundaries of heterochromatin. (B, C) Four-fold enlargements of the  
 504 heterochromatin and a euchromatin positions boxed in panel A. (D – G) Examples of  
 505 (D) dinucleosomes connected by linker DNA, (E) face-to-face packed nucleosomes, (F)  
 506 dinucleosomes not connected by linker DNA but likely to be in sequence with a third  
 507 nucleosome that was missed by our analysis, and (G) trinucleosomes connected by  
 508 linker DNA. For clarity, adjacent remapped nucleosomes were cropped out. (H) The

509 lengths ( $\ell_1, \ell_2$ ), angles relative to the dyad axis ( $\omega_1, \omega_2$ ), and rotation around the linker-  
510 DNA axes ( $\psi_1, \psi_2$ ) are uncorrelated.

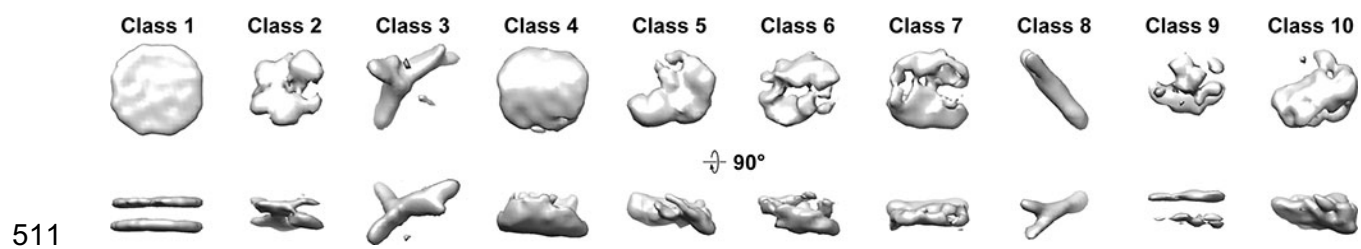

**SUPPLEMENTAL FIGURE S1: Classification control**

Control 3-D class averages of “nucleosome” template-matching hits taken from the cytoplasm and mitochondrion.

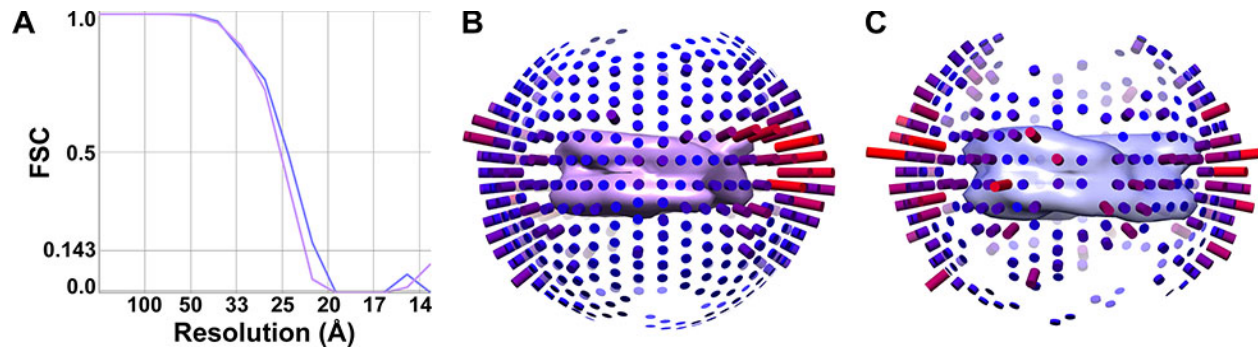

515

516 **SUPPLEMENTAL FIGURE S2: Analysis of nucleosome averages**

517 **(A)**, The resolution of the two nucleosome classes with short (magenta) and long (blue)  
518 linker DNA are respectively 24 and 21 Å based on the Fourier Shell Correlation (FSC) =  
519 0.143 criterion. **(B, C)** Angular-distribution plots of the nucleosome classes with **(B)**  
520 short linker DNA and **(C)** long linker DNA densities. The number of particles oriented  
521 with the view vector parallel to each cylinder is proportional to the cylinder's height and  
522 redness. An isosurface of each average is shown at the center of the corresponding  
523 angular-distribution plot.

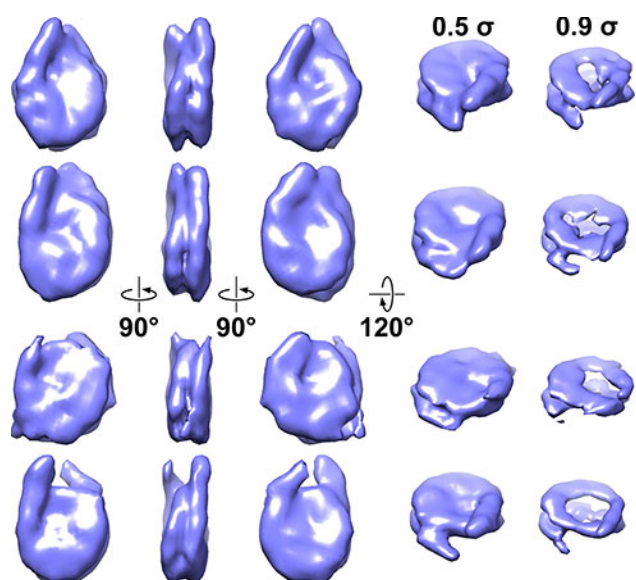

524

525 **SUPPLEMENTAL FIGURE S3: Three-dimensional classification into four classes**

526 Classification of nucleosomes into four classes, showing the front, side, and back, and

527 oblique views (left to right). All columns are presented as in Figure 2D.

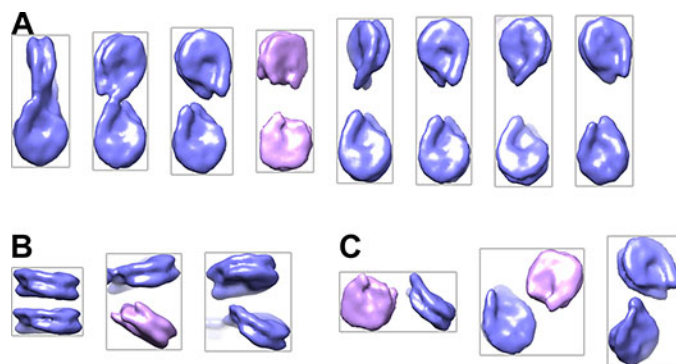

528

529 **SUPPLEMENTAL FIGURE S4: Additional examples of dinucleosomes**

530 (A) Dinucleosomes that are likely to be connected by linker DNA. (B) Dinucleosomes

531 interacting face to face or with their dyad axes intersecting at the left. (C)

532 Dinucleosomes that are neither connected by linker DNA nor packed face to face. All

533 panels share the color scheme as Figure 3.

534 **Supplemental Table S1: Cryo-ET parameters**

|                                        |                                     |
|----------------------------------------|-------------------------------------|
| Microscope                             | Titan Krios (Thermo Fisher)         |
| Energy                                 | 300 KeV                             |
| Gun type                               | FEG                                 |
| Camera                                 | K2 Summit (Gatan)                   |
| Recording mode                         | counting mode                       |
| Subframe duration                      | 0.4 seconds                         |
| Subframes / tilt                       | 4                                   |
| Energy filter                          | Quantum LS (Gatan)                  |
| Zero-loss slit width                   | 20 eV                               |
| Calibrated pixel size                  | 3.45 Å                              |
| Defocus                                | in focus, Volta phase contrast      |
| Cumulative dose                        | 120 e <sup>-</sup> / Å <sup>2</sup> |
| Tilt range                             | ± 60°, bidirectional                |
| Tilt increment                         | 2°                                  |
| Tomography software                    | SerialEM 3.6.4                      |
| Subframe alignment software            | alignframes (IMOD)                  |
| Tomogram processing & visualization    | IMOD 4.9                            |
| Fiducial model generation              | patch tracking (IMOD)               |
| Template matching                      | PEET 1.11                           |
| Density map creation & editing         | Bsoft 1.8.8                         |
| Subtomogram classification & averaging | RELION 2.1                          |
| Density map visualization & docking    | UCSF Chimera 1.11                   |

535

536



537 **SUPPLEMENTAL MOVIES S1 and S2: Density maps and docked atomic models of**  
538 **HeLa nucleosomes**  
539 Subtomogram averages and models of the nucleosome classes with short (S1) and  
540 long (S2) linker DNAs are contoured at  $0.5 \sigma$ . The color scheme is identical to Figure 2,  
541 F and G.
